# Supplementary material for: Facile synthesis of polyamide 6 (PA6)-based thermoplastic elastomers with a well-defined microphase separation structure by melt polymerization
Source: Royal Society of Chemistry journal article supplement (doi:10.1039/c8py00068a), 2018-01-01
Supplement: c8py00068a1.pdf [file c8py00068a1.pdf]

## Supporting information

### Facile synthesis of polyamide 6 (PA6)-based thermoplastic elastomers with well-defined microphase separation structure by melt polymerization

Ruchao Yuan,<sup>†,‡</sup> Shuo Fan,<sup>†,‡</sup> Dequn Wu,<sup>†,‡</sup> Xueli Wang,<sup>§</sup> Jianyong Yu,<sup>§</sup> Lijun Chen,<sup>||</sup> Faxue Li.\*<sup>†,‡</sup>

<sup>a</sup> Key Laboratory of Textile Science & Technology, Ministry of Education, College of Textiles, Donghua University, Shanghai 201620, China.

<sup>b</sup> College of Textiles, Donghua University, Shanghai 201620, China.

<sup>c</sup> Innovation Center for Textile Science & Technology, Donghua University, Shanghai 201620, China.

<sup>d</sup> Department of Research & Development, Highsun Group, Fujian 350207, China.

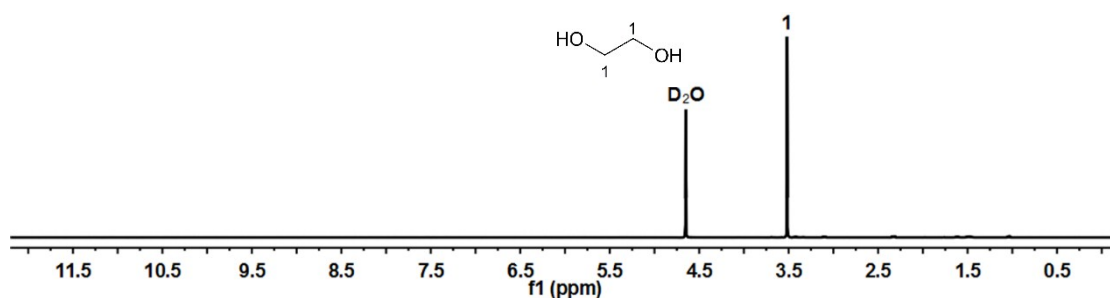

Fig. S1 <sup>1</sup>H NMR spectra of By-products stemmed from Step 2.

Table S1. Tensile Properties of TPAEs

| Samples | Young's modulus <sup>a</sup><br>(MPa) | Stress at break <sup>a</sup><br>(MPa) | Strain at break <sup>a</sup><br>(%) | Tensile toughness <sup>b</sup><br>( $\times 10^9 \text{ J} \cdot \text{m}^{-3}$ ) |
|---------|---------------------------------------|---------------------------------------|-------------------------------------|-----------------------------------------------------------------------------------|
| TPAE-0  | $3.3 \pm 0.3$                         | $63 \pm 1.2$                          | $93 \pm 15$                         | $5.1 \pm 0.3$                                                                     |
| TPAE-10 | $2.8 \pm 0.4$                         | $55 \pm 2.0$                          | $101 \pm 24$                        | $5.2 \pm 0.3$                                                                     |
| TPAE-30 | $2.4 \pm 0.2$                         | $40 \pm 1.8$                          | $369 \pm 51$                        | $13.2 \pm 0.5$                                                                    |
| TPAE-50 | $1.5 \pm 0.3$                         | $33 \pm 2.5$                          | $461 \pm 55$                        | $13.9 \pm 0.6$                                                                    |
| TPAE-70 | $1.0 \pm 0.2$                         | $29 \pm 1.1$                          | $514 \pm 40$                        | $12.6 \pm 0.5$                                                                    |

<sup>a</sup> Directly determined from tensile test. <sup>b</sup> Calculated by using area underneath the stress-strain curve.<sup>1</sup>

---

1. O.Balkan and H.Demirer (2010). "Polym. Compos". 31: 1285. ISSN 1548-0569.
